# Supplementary material
Source: PubMed Central journal article supplement (PMC2643828)
Supplement: supp_29_5_1152__1.pdf [file supp_29_5_1152__1.pdf]

## **Supplementary Materials and Methods:**

### **Plasmid Design**

HuR cDNA was cloned into pGEX-6P1 backbone (Amersham) using EcoRI and XhoI sites. This construct was used for the RNA pull down assays.

To generate the 4E3'UTR construct, the 3'UTR of eIF4E was amplified from DNase treated RNA isolated from HEK293 or U2Os cells using Titan-PCR kit. The PCR product was re-amplified using primers with EcoRI and XhoI restriction sites and subsequently cloned after the LacZ ORF in pcDNA3.1HisLacZ. According to sequencing results, the construct corresponds to bases 1506-2476 of eIF4E (gi: 54873625). Shorter constructs of the 4E3'UTR corresponding to regions with AU-rich sequences (1<sup>st</sup>+2<sup>nd</sup>+3<sup>rd</sup> ARE, 1<sup>st</sup> ARE, 2<sup>nd</sup> ARE, 3<sup>rd</sup> ARE) and without (noARE) were cloned using the same strategy as above. pfuTurbo (Stratagene) was used in all PCR reactions and the primers used to generate all of the above constructs are listed in Table 1.

### **T7 RNA probes**

Templates for *in vitro* synthesis of biotinylated transcripts were generated by PCR from either human eIF4E cDNA (Open Biosystems; gi:23243253), pcDNA3.1HisLacZ/4E3'UTR, or 3'UTR-GAPDH using primers listed in Table 2. All 5' primers contained the T7 polymerase sequence. *In vitro* transcriptions were carried out using Megascript kit (Ambion) according to the manufacturer's instruction, using 1:10 ratio of CTP and 11-biotin CTP (NEB). *In vitro* transcribed, biotinylated probes were purified using

phenol:chlorophorm extraction and MegaClean columns (Ambion), and the efficiency of biotinylation was verified by Northern Blot (data not shown).

**Table 1:** List of primers used for construct design

| Construct                                                          | Primer Name     | Primer Sequence              | DNA sequence (bp)      |
|--------------------------------------------------------------------|-----------------|------------------------------|------------------------|
| pGEX6P1-HuR                                                        | Eco-HuR-5F      | GCACATGAATTCATGTCTAATGGTTATG | 1-981 <sup>a</sup>     |
|                                                                    | Xho-HuR-3R      | CAGTGACTCGAGTTATTTGTGGGACTTG |                        |
| pcDNA3.1LacZ-4E3'UTR                                               | IT-Eco-4E3UTR-F | GCACATGAATTCCTTAAGAAGACAC    | 1506-2476 <sup>b</sup> |
|                                                                    | IT-Xho-4E3UTR-R | CAGTGACTCGAGTAAAAGACAATT     |                        |
| pcDNA3.1LacZ-noARE                                                 | IT-Eco-4E3UTR-F | GCACATGAATTCCTTAAGAAGACAC    | 1506-2238 <sup>b</sup> |
|                                                                    | NS-Xho-REV1     | CAGTGACTCGAGATCACTGATTTGAAT  |                        |
| pcDNA3.1LacZ-1 <sup>st</sup> +2 <sup>nd</sup> +3 <sup>rd</sup> ARE | NS-Eco-4EUTR4-F | GCACATGAATTCATTCAAATCAGTGAT  | 2224-2476 <sup>b</sup> |
|                                                                    | IT-Xho-4E3UTR-R | CAGTGACTCGAGTAAAAGACAATT     |                        |
| pcDNA3.1LacZ-1 <sup>st</sup> ARE                                   | 1st-ARE-Eco-5F  | GCACATGAATTCATTTATGCATTTTCAT | 2211-2283 <sup>b</sup> |
|                                                                    | 1st-ARE-Xho-3R  | CAGTGACTCGAGTTTTTTTATAATCCAC |                        |
| pcDNA3.1LacZ-2 <sup>nd</sup> ARE                                   | 2nd-ARE-Eco-5F  | GCACATGAATTCCTAACTAGAATTAG   | 2304-2376 <sup>b</sup> |
|                                                                    | 2nd-ARE-Xho-3R  | CAGTGACTCGAGAATAACCTAAGTAAT  |                        |
| pcDNA3.1LacZ-3 <sup>rd</sup> ARE                                   | 3rd-ARE-Eco-5F  | GCACATGAATTCCTTTTAACACTTTGTA | 2348-2420 <sup>b</sup> |
|                                                                    | 3rd-ARE-Xho-3R  | CAGTGACTCGAGGAATGGGACTGCTTT  |                        |

\* Restriction sites are underlined

a) h-ELAV/HuR; gi:38201713; 1-981 bp

b) h-eIF4E; gi:54873625; 1-2493 bp

**Table 2:** List of primers used to generate T7 RNA probes

| T7-Probe            | Name        | Primer Sequence                                        | DNA sequence           |
|---------------------|-------------|--------------------------------------------------------|------------------------|
| 4E-5'UTR            | T7-5UTR-5F  | <u>TAATACGACTCACTATAGGGAGAC</u> CGGGGCCCGG<br>AGTGGCTT | 1-855 <sup>a</sup>     |
|                     | T7-5UTR-3R  | GGAGCGGTTGTGCGATCAGATCGATCTAAG                         |                        |
| 4E-CDR              | T7-eIF4E-5F | <u>TAATACGACTCACTATAGGGAGA</u> ATGGCGACTG<br>TCGAA     | 856-1509 <sup>a</sup>  |
|                     | T7-eIF4E-3R | TTAAACAACAAACCTATTTTTAGTGGT                            |                        |
| 4E-3'UTR            | T7-4EUTR1   | <u>TAATACGACTCACTATAGGGAGAT</u> TAAAGAAGAC<br>ACCTTCTG | 1506-2476 <sup>a</sup> |
|                     | T7-3UTR-REV | AAGACAATTCACTGTACACATTTTATT                            |                        |
|                     | T7-GAPDH-R1 | GGTTGAGCACAGGGTACTTTATTGATG                            |                        |
| 1 <sup>st</sup> ARE | T7-ARE1-5F  | <u>TAATACGACTCACTATAGGGAGA</u> ATTTATGCATT<br>TCAT     | 2211-2283 <sup>a</sup> |
|                     | T7ARE1-REV  | TTTTTTATAATCCACAATTATGTT                               |                        |
| 2 <sup>nd</sup> ARE | T7-ARE2-5F  | <u>TAATACGACTCACTATAGGGAGAC</u> CCTAACTAGA<br>ATTAG    | 2304-2376 <sup>a</sup> |
|                     | T7-ARE2-REV | AATAACCTAAGTAATACAAAGTGT                               |                        |
| 3 <sup>rd</sup> ARE | T7-ARE3-5F  | <u>TAATACGACTCACTATAGGGAGAT</u> TTTAAACTT<br>TGTA      | 2348-2420 <sup>a</sup> |
|                     | T7-ARE3-REV | GAATGGGACTGCTTTTCTACTTGA                               |                        |
| GAPDH-3'UTR         | T7-GAPDH-F1 | <u>TAATACGACTCACTATAGGGAGAG</u> ACCCCTGGA<br>CCACC     | 1111-1310 <sup>b</sup> |

\*T7 polymerase sequences are underlined

a) h-eIF4E; gi:54873625; 1-2493 bp

b) h-GAPDH; gi:83641890; 1-1310 bp
